# Supplementary material for: PIN-FORMED1 polarity in the plant shoot epidermis is insensitive to the polarity of neighboring cells
Source: PubMed Central journal article supplement (PMC9494258; doi:10.1016/j.isci.2022.105062), 2022-09-05
Supplement: mmc1.pdf [file mmc1.pdf]

iScience, Volume 25

## **Supplemental information**

**PIN-FORMED1 polarity in the plant  
shoot epidermis is insensitive  
to the polarity of neighboring cells**

**Abdul Kareem, Neha Bhatia, Carolyn Ohno, and Marcus G. Heisler**

## **Supplemental information**

### **PIN-FORMED1 polarity in the plant shoot epidermis is insensitive to the polarity of neighbouring cells**

**Abdul Kareem, Neha Bhatia, Carolyn Ohno & Marcus G. Heisler**

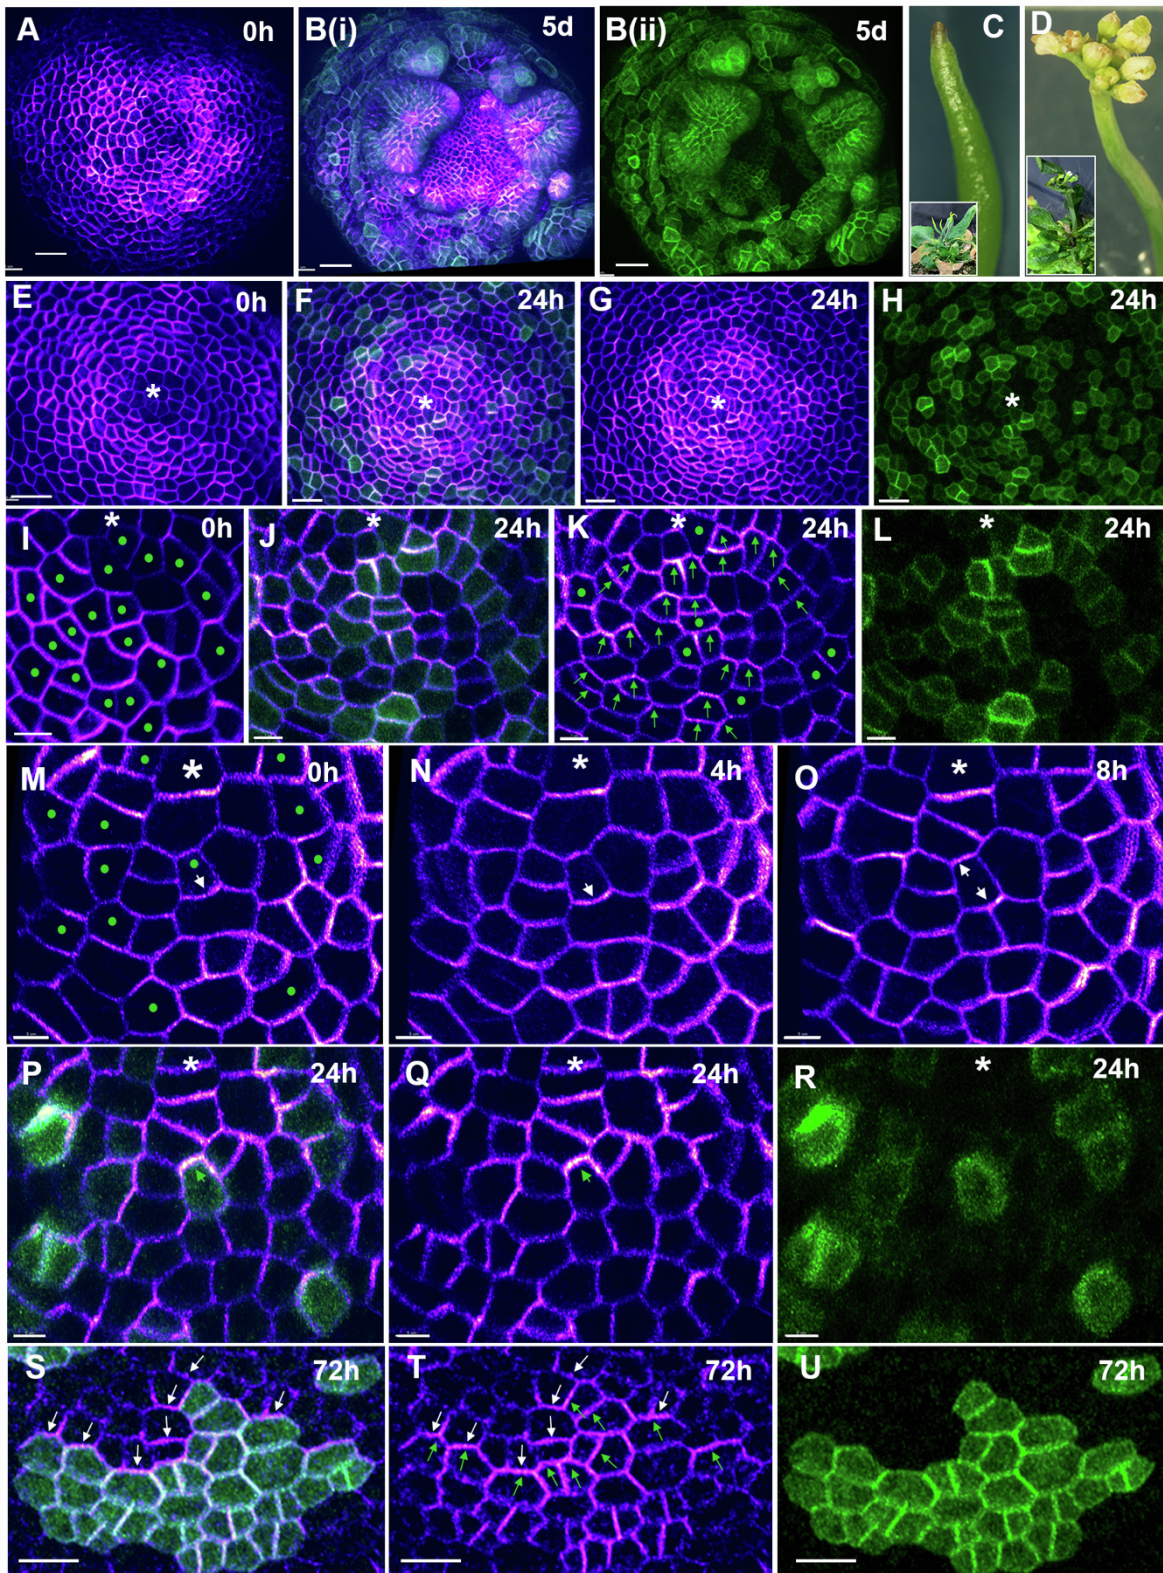

**Figure S1. PIN1 polarity in response to PID clones, Related to Figure 2.**

(A) *pid-4* meristem expressing PIN1-GFP (magenta) before induction of PID-2V. (B-i) Same *pid-4* meristem expressing PIN1-GFP (magenta) as in (A) 5 days after clonal induction of PID-2V

(green). Note developing organs marked by large sectors of PID-2V expression. (B-ii), Same as B-i showing PID-2V (green) alone. (C) pin-like structure of uninduced *pid-4 PIN1-GFP* inflorescence. (D) Inflorescence of *pid-4 PIN1-GFP* rescued by clonal expression of PID-2V after 1 week. (E-R) Images of the *pid-4* meristem before (E,I,M) and after (F-H, J-L, N-R) induction of *PID-2V* (green) expressing clones showing changes in *PIN1-GFP* (magenta) polarity. (I-L) Magnified images of the same meristem in E-H. (M-R), Magnified high resolution time-series images of the same meristem from Figure 2 E-J. Note apical shift in *PIN1-GFP* polarity (green arrows in K,P, and Q) in cells expressing *PID-2V* (green dots in I,M). Green dots in K mark cells with undiscernible polarity. Note a gradual shift in *PIN1-GFP* (magenta) polarity from basal (M,N) to bipolar (O) to apical (P,Q) over time after induction of *PID-2V* (green). Arrows indicate observed polarity, i.e., downward= basal, upward= apical, two arrows in opposite directions = bipolarity. Asterisk marks middle of the meristem. (S-U) Flank of a *pid-4* shoot apex showing opposing *PIN1-GFP* (magenta) polarities (green and white arrows in S and T) in adjacent cells due to differential *PID-2V* expression (green) (S,U) 3days after induction. Scale bar = 30  $\mu\text{m}$  (A-B), 20  $\mu\text{m}$  (E-H), 7  $\mu\text{m}$  (I-L), 5  $\mu\text{m}$  (M-R), 20  $\mu\text{m}$  (S-U).
